# Supplementary material
Source: PubMed Central journal article supplement (PMC8391769)

## Supplemental Online Content

Jenei K, Meyers DE, Prasad V. The inclusion of women in global oncology drug trials over the past 20 years. *JAMA Oncol*. Published online August 26, 2021.  
doi:10.1001/jamaoncol.2021.3686

**eFigure.** Identification of completed oncology clinical trials for lung, colon, thyroid, melanoma, kidney, and pancreas cancer drugs between 2000-2020

This supplemental material has been provided by the authors to give readers additional information about their work.

**eFigure.** Identification of completed oncology clinical trials for lung, colon, thyroid, melanoma, kidney, and pancreas cancer drugs between 2000-2020

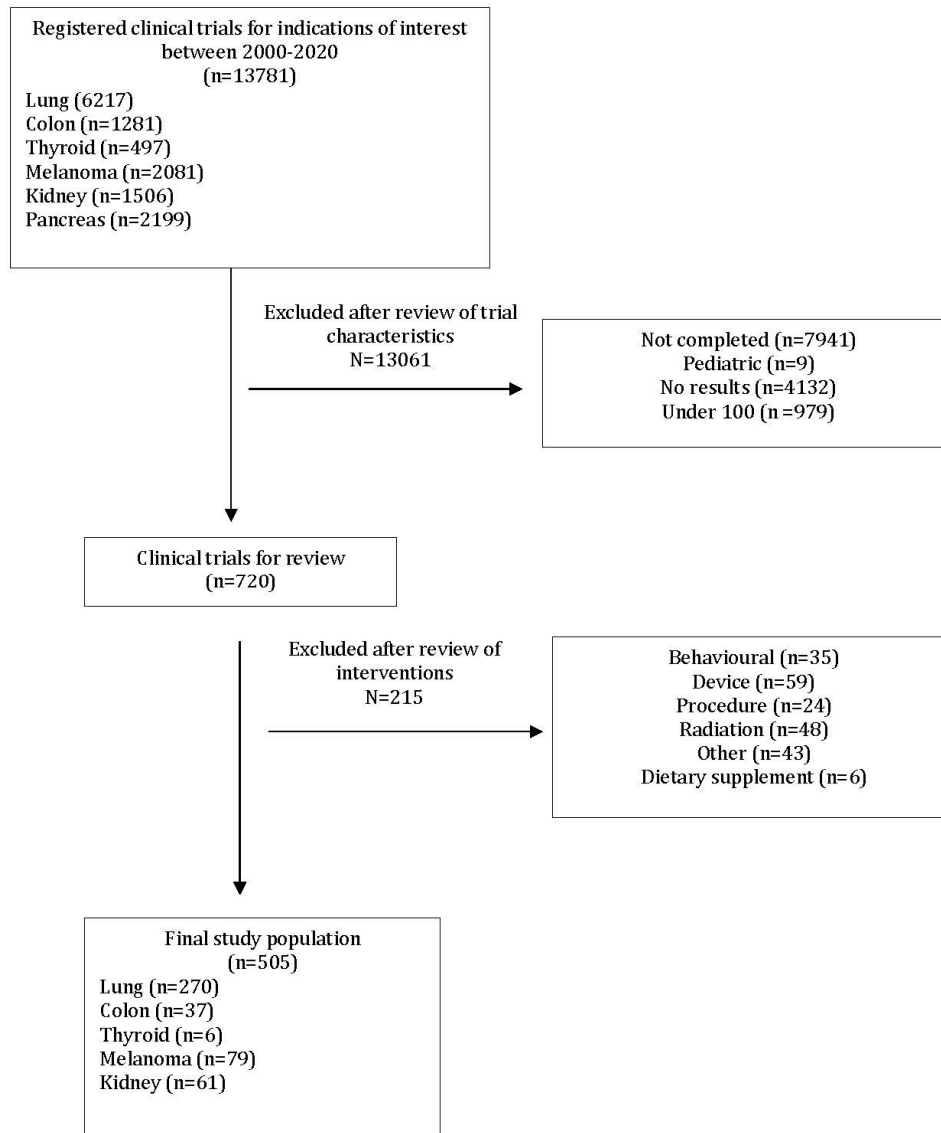

Supplement: jamaoncol-e213686-s001.pdf [file jamaoncol-e213686-s001.pdf]
